# Supplementary material for: Sequential assignment of NMR spectra of peptides at natural isotopic abundance with zero- and ultra-low-field total correlation spectroscopy (ZULF-TOCSY)
Source: Royal Society of Chemistry journal article supplement (doi:10.1039/d0cp06337a), 2021-01-01
Supplement: d0cp06337a2.pdf [file d0cp06337a2.pdf]

## Electronic Supplementary Information

# Sequential assignment of NMR spectra of peptides at natural isotopic abundance with Zero and Ultra Low-Field-TOCSY

Alexey S. Kiryutin,<sup>\*a</sup> Ivan V. Zhukov,<sup>a</sup> Fabien Ferrage,<sup>b</sup> Geoffrey Bodenhausen,<sup>b</sup>

Alexandra V. Yurkovskaya,<sup>a</sup> Konstantin L. Ivanov<sup>†a</sup>

<sup>a</sup> *International Tomography Center, Siberian Branch of the Russian Academy of Sciences and Novosibirsk State University, Novosibirsk, 630090, Russia*

<sup>b</sup> *Laboratoire des Biomolécules, LBM, Département de chimie, École normale supérieure, PSL University, Sorbonne Université, CNRS, 75005 Paris, France*

\* **Corresponding authors**, emails: [kalex@tomo.nsc.ru](mailto:kalex@tomo.nsc.ru) (A. S. Kiryutin)

† Konstantin L. Ivanov passed away on March 5<sup>th</sup> 2021 at the age of 44 years as a consequence of Covid-19, while the final revisions of this paper were being prepared.

### This file contains:

1. Relaxation data for Boc-Met-enkephalin
2. 2D-NMR spectra of Boc-Met-enkephalin

## 1. Relaxation data for Boc-Met-enkephalin

Here we present relaxation data for the system under study, focusing on the carbon nuclei of interest ( $C'$  and  $C\alpha$  carbons) and  $H\alpha$  protons. These data are summarized in **Tables S1** and **S2**. The measurements at high field were done in a standard way (inversion-recovery experiments) at 9.4 and 16.4 T. Measurements at low fields were done using fast field-cycling. In such experiments, we first let the spins relax to equilibrium at  $B_0 = 9.4$  T. Subsequently, the sample is shuttles to obtain a field switch  $B_0 \rightarrow B_{rel}$  and spins start to relax to a new equilibrium at the  $B_{rel}$  field. The relaxation delay  $\tau_{rel}$  is incremented to monitor the evolution of the magnetization at this field. Subsequently, the field is switched back  $B_{rel} \rightarrow B_0$  and the NMR spectrum acquired. By integrating signals in the NMR spectra we obtain the relaxation behavior of nuclei as a function of  $\tau_{rel}$ . Typical relaxation curves of this kind measured at  $B_{rel} = 0.3$  T are shown in **Figure S1** for carbonyl carbons and  $C\alpha$  carbons of Boc-Met-enkephalin. To determine relaxation times these curves were fitted to mono-exponential functions, which provide good fits in most cases.

An unexpected initial increase of the polarization of the  $C\alpha$  carbon is caused by cross-relaxation in directly bound  $^1H$ - $^{13}C$  spin pairs. As has been shown before, cross-relaxation manifests itself in the  $^{13}C$  relaxation trace, giving rise to a bi-exponential time dependence.<sup>1,2</sup> Here, in most cases, we were able to follow only the slow component of such bi-exponential relaxation curves. The analysis of such bi-exponential curves is discussed at length in a previous publication<sup>2</sup>.

**Table S1.** Apparent longitudinal relaxation times  $T_1^{app}(^{13}C)$  [s] of Boc-Met-enkephalin carbonyl- and  $\alpha$ -carbons at 25 °C,  $B_0 = 9.4$  and 0.3 T.

| Site              | 9.4 T     | 0.3 T      |
|-------------------|-----------|------------|
| Met $C'$          | 5.9±0.4   | 3.5±1.9    |
| Tyr $C'$          | 2.5±0.2   | 3±1.5      |
| Phe $C'$          | 3.0±0.2   | 2.3±0.7    |
| Gly-1 $C'$        | 3.0±0.3   | 4±2.5      |
| Gly-2 $C'$        | 2.2±0.2   | 2.9±1.5    |
| Tyr $C\alpha$     | 0.35±0.03 | 0.13±0.17* |
| Phe $C\alpha$     | 0.29±0.02 | 0.44±0.33* |
| Met $C\alpha$     | 0.45±0.02 | 0.7±0.76*  |
| Gly-2,3 $C\alpha$ | 0.24±0.01 | 0.19±0.9*  |

Values marked with a star (\*) were obtained by fitting relaxation curves with growing mono-exponential functions. These values correspond to the slow components of the bi-exponential cross-relaxation kinetics of  $C\alpha$  carbons.

**Table S2.** Apparent longitudinal relaxation times  $T_1^{app}(^1H)$  [s] of  $\alpha$ -protons in Boc-Met-enkephalin at 25 °C,  $B_0 = 9.4$  and 16.4 T.

| Site              | 9.4 T    | 16.4 T  |
|-------------------|----------|---------|
| Met $H\alpha$     | 1.3±0.1  | 2.0±0.1 |
| Tyr $H\alpha$     | 1.3±0.1  | 2.1±0.1 |
| Phe $H\alpha$     | 1.3±0.1  | 1.9±0.1 |
| Gly-2,3 $H\alpha$ | 0.4±0.05 | 0.8±0.1 |

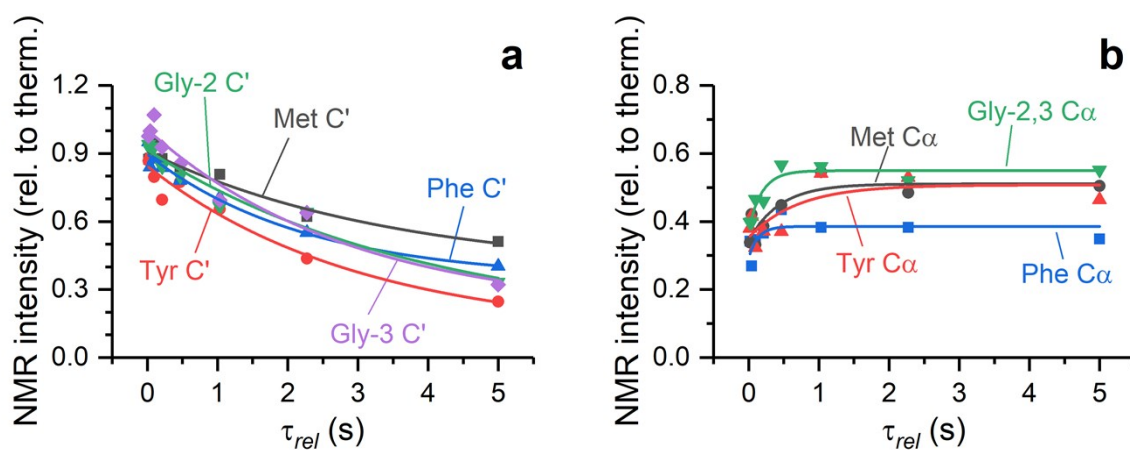

**Figure S1.** Relaxation curves of (a) carbonyl and (b)  $\alpha$ -carbons of Boc-Met-enkephalin at 25° C, measured at  $B_{rel} = 0.3$  T. The field switching duration was 200 ms, the stabilization delay prior to detection at high field was 25 ms, the relaxation delay was 8 s; 864 scans were collected for each value of  $\tau_{rel}$ . The overall duration of the experiments was ca. 24 hours.

## 2. 2D-NMR spectra of Boc-Met-enkephalin

In this section, we present complete 2D-NMR spectra of the compound under study, highlighting various  $^1\text{H}$ - $^{13}\text{C}$  correlations.

In **Figure S2** we present the complete ZULF-TOCSY spectrum, whereas in **Figure 3b** only part of this 2D spectrum is shown, highlighting the region corresponding to carbonyl carbons and  $\text{H}_\alpha$  protons. In the full spectrum, one can see additional resonances, corresponding to correlations in aromatic rings of tryptophan and phenyl-alanine, some correlations in the methionine side chain, and all correlations within Boc moiety. Two distinct Boc conformations exist possibly the *cis* and *trans* conformation of the amide bond, each giving rise to a specific set of cross-peaks.

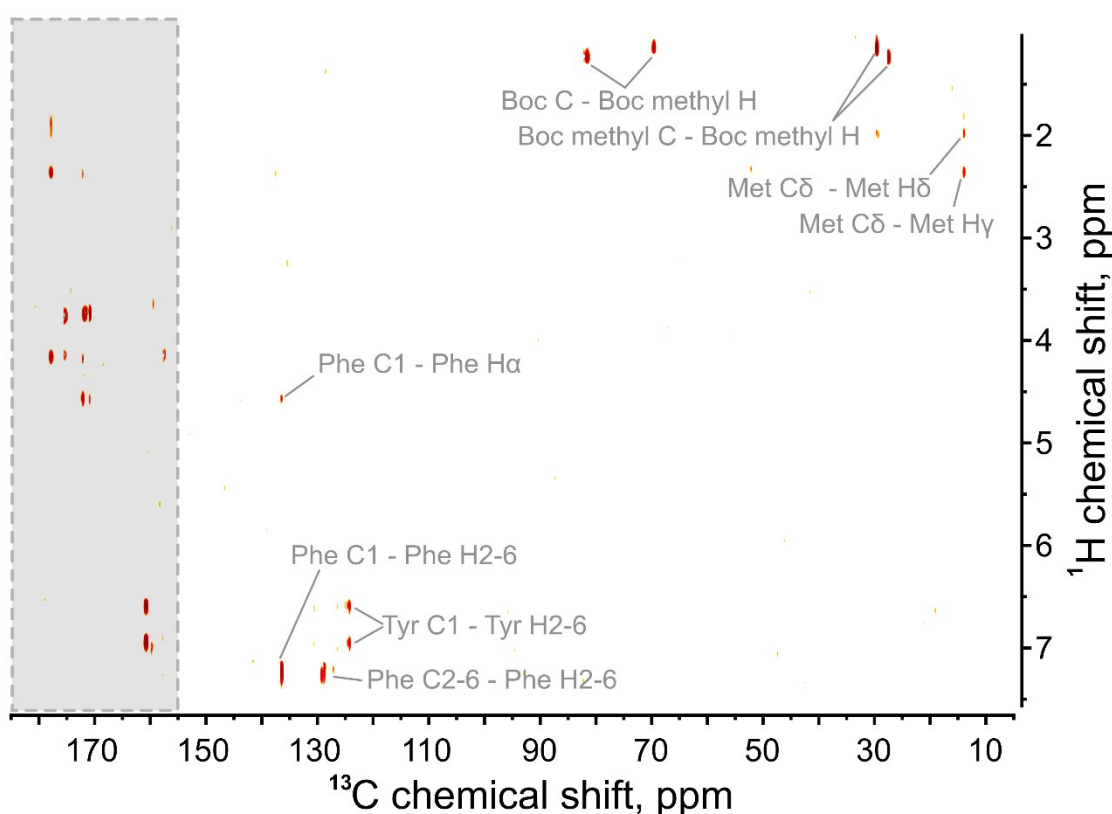

**Figure S2.** Complete  $^{13}\text{C}$ - $^1\text{H}$  ZULF-TOCSY spectrum of 83 mM Boc-Met-enkephalin, pH 10.9, 25°C, taken at  $B_0 = 9.4$  T. The part of the spectrum shown in **Figure 3b** of the main text is highlighted by a grey rectangle. Experimental details: 80 increments in the indirect dimension, 256 scans per transient, relaxation delay 6 s, sample transfer time 403 ms in each direction,  $B_{UL} = 50$  nT,  $\tau_{opt} = \tau_{mix}^{opt} = 100$  ms (corresponding to  $J_{CH} = 2.5$  Hz), total acquisition time ca. 58 hours. The time-domain signal  $S(t_1, t_2)$  was multiplied by a  $90^\circ$  shifted sine squared window function in both dimensions prior to 2D Fourier transformation. The resulting spectrum  $S(f_1, f_2)$  is given by  $512 \times 1024$  data points.  $\text{H}_\alpha$ - $\text{C}_\alpha$  correlations are not visible due to fast relaxation of the  $\alpha$ -carbons.

Likewise, in **Figure S3** we present the complete HMBC spectrum, highlighting some of the cross-peaks belonging to aromatic protons of tryptophan and phenylalanine, to correlations in the methionine side-chain, and to correlations within the Boc-moiety. Note that the two sets of cross-peaks correspond to two different Boc conformations.

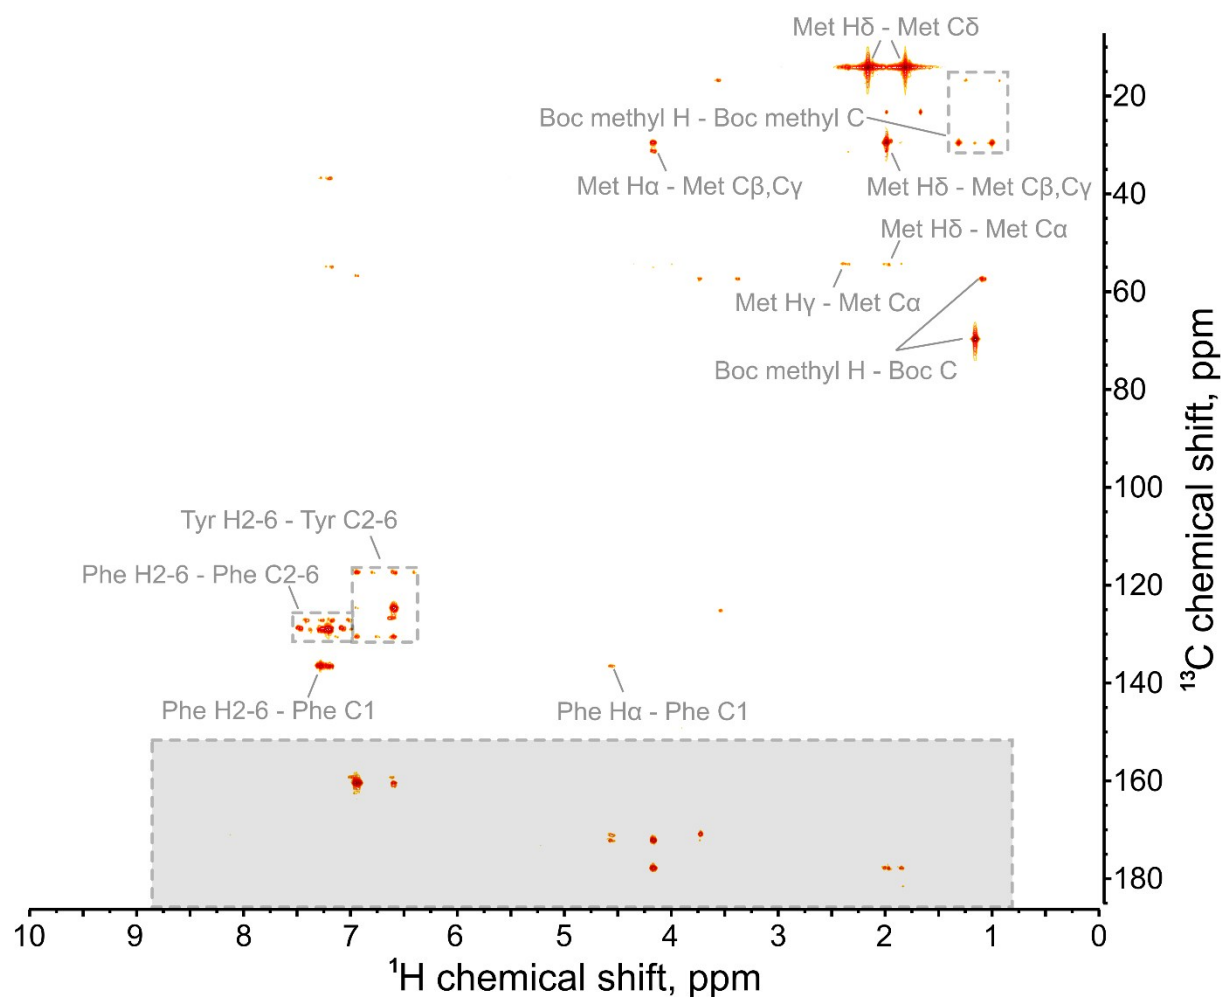

**Figure S3.** Complete  $^1\text{H}$ - $^{13}\text{C}$  HMBC spectrum of 83 mM Boc-Met-enkephalin, pH 10.9, 25  $^\circ\text{C}$ ,  $B_0 = 9.4$  T. The indirect dimension was sampled with 1024 values of  $t_1$  were over 180 ppm (resolution 17.7 Hz/point), 56 scans per transient, the long range high-pass  $J^L(^{13}\text{C} - ^1\text{H})$ -filter delay was optimized to 1 Hz, the low-pass  $J^1(^{13}\text{C} - ^1\text{H})$ -filter delay was optimized to 100 Hz to suppress direct correlations, the relaxation delay was 3 s, the total acquisition time ca. 70 hours. The time-domain signal  $S(t_1, t_2)$  was multiplied by a  $90^\circ$  shifted sine squared window function in both dimensions, the spectrum  $S(f_1, f_2)$  is represented by 2048 $\times$ 4096 data points.

Finally, **Figure S4** shows the HSQC spectrum of Boc-Met-enkephalin. One can see that the signals of interest, corresponding to correlations between the carbonyl carbons and the  $\text{H}_\alpha$ -protons, are missing because the inter-pulse delays in the polarization transfer block are not optimal for detecting these cross-peaks.

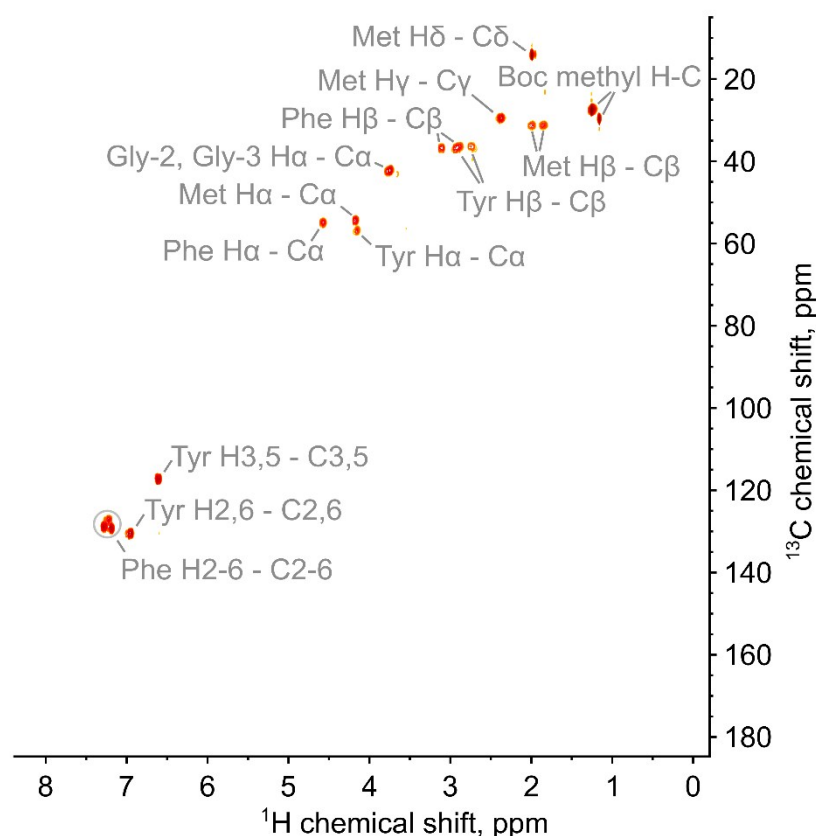

**Figure S4.**  $^1\text{H}$ - $^{13}\text{C}$  HSQC spectrum of 83 mM Boc-Met-enkephalin, pH 10.9, 25 °C, 9.4 T. Parameters: 256 increments of  $t_1$  were used to sample the indirect dimension over 180 ppm (resolution 247.6 Hz/point), 32 scans per transient, delays in INEPT transfer optimized for  $J^1(^{13}\text{C} - ^1\text{H})=130$  Hz, relaxation delay 3 s, total acquisition time ca. 8 hours. The time-domain signal  $S(t_1, t_2)$  was multiplied by a 90° shifted sine squared window function in both dimensions, the spectrum  $S(f_1, f_2)$  is represented by 2048×2048 data points.

1. I. V. Zhukov, A. S. Kiryutin, A. V. Yurkovskaya, Y. A. Grishin, H.-M. Vieth and K. L. Ivanov, *Phys. Chem. Chem. Phys.*, 2018, 20, 12396-12405.
2. N. Bolik-Coulon, P. Kaderavek, P. Pelupessy, J. N. Dumez, F. Ferrage and S. F. Cousin, *J. Magn. Reson.*, 2020, 313.
